# Supplementary material for: Dynamic motions and architectural changes in DNA supramolecular aggregates visualized via transmission electron microscopy without liquid cells
Source: Royal Society of Chemistry journal article supplement (doi:10.1039/d1nr04133a), 2021-01-01
Supplement: d1nr04133a11.pdf [file d1nr04133a11.pdf]

## SUPPLEMENTAL INFORMATION

### **Dynamic Motions and Architectural Changes in DNA Supramolecular Aggregates Visualized via Transmission Electron Microscopy without Liquid Cells**

*Zhuoyang Lu<sup>a†</sup>, Xiangyang Liu<sup>b†</sup>, Maogang He<sup>b</sup>, Jiangang Long<sup>a\*</sup>, Jiankang Liu<sup>a\*</sup>*

- a. The Key Laboratory of Biomedical Information Engineering of Ministry of Education, School of Life Science and Technology, Xi'an Jiaotong University, Xi'an 710049, Shaanxi, China.
- b. The Key Laboratory of Thermal Fluid Science and Engineering of Ministry of Education, School of Energy and Power Engineering, Xi'an Jiaotong University, Xi'an 710049, Shaanxi, China.

**\* Corresponding authors:** Jiankang Liu, [j.liu@xjtu.edu.cn](mailto:j.liu@xjtu.edu.cn); Jiangang Long, [jglong@xjtu.edu.cn](mailto:jglong@xjtu.edu.cn)

Xi'an Jiaotong University, 28 West Xianning Road, Xi'an, Shaanxi Province,  
China, 710049

Tel: J. Liu: +86-151-0923-3890; J. Long: +86-199-2907-2355

<sup>†</sup> These authors contributed equally.

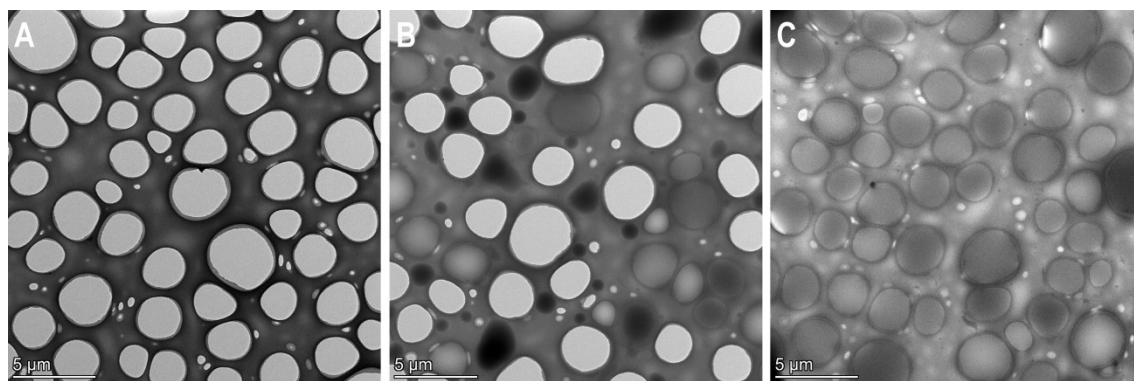

Figure S1. Overview of copper grids with and without ultrathin IL films. (A) TEM image of copper grid with no IL film. (B) TEM image of copper grid partially covered by IL film. Thick droplets can be seen next to the carbon hole after bursting of the IL films. (C) TEM image of copper grid fully covered by IL film.
